# Supplementary material
Source: PubMed Central journal article supplement (PMC5869719)
Supplement: NIHMS951180-supplement-Supplementary_Materials.pdf [file NIHMS951180-supplement-Supplementary_Materials.pdf]

## Supplementary Materials

### Genome-wide association and interaction studies of CSF T-tau/A $\beta$ 42 ratio in ADNI cohort

Jin Li<sup>a</sup>, Qiushi Zhang<sup>a,b</sup>, Feng Chen<sup>a</sup>, Xianglian Meng<sup>a</sup>, Wenjie Liu<sup>a</sup>, Dandan Chen<sup>a,b</sup>, Jingwen Yan<sup>c,d,e</sup>, Sungeun Kim<sup>c</sup>, Lei Wang<sup>a</sup>, Weixing Feng<sup>a</sup>, Andrew J. Saykin<sup>c</sup>, Hong Liang<sup>a,\*</sup>, Li Shen<sup>c,d,\*</sup>, and for the ADNI

<sup>a</sup>College of Automation, Harbin Engineering University, 145 Nantong Street, Harbin, China, 150001

<sup>b</sup>College of Information Engineering, Northeast Dianli University, 169 Changchun Street, Jilin, China, 132012

<sup>c</sup>Center for Neuroimaging, Department of Radiology and Imaging Sciences, Indiana University School of Medicine, 355 West 16th Street, Suite 4100, Indianapolis, IN 46202

<sup>d</sup>Center for Computational Biology and Bioinformatics, Indiana University School of Medicine, 410 West 10th Street, Suite 5000, Indianapolis, IN 46202

<sup>e</sup>Department of BioHealth Informatics, Indiana University School of Informatics and Computing, Indianapolis, IN 46202

#### Comparative Study on Three CSF Phenotypes: T-tau, A $\beta$ 42, and the T-tau/A $\beta$ 42 ratio

In addition to the T-tau/A $\beta$ 42 ratio as the phenotype, we performed GWAS and GWIS on CSF T-tau alone and CSF A $\beta$ 42 alone. The results showed that the T-tau/A $\beta$ 42 ratio was a more sensitive marker than A $\beta$ 42 and T-tau in both GWAS and GWIS (see Table s1a and Table s1b).

In the single-marker analysis, while 24 SNPs exhibited genome-wide significance to the T-tau/A $\beta$ 42 ratio, only 6 and 3 SNPs showed genome-wide significance to A $\beta$ 42 and T-tau, respectively (Table s1a). Among the 24 significant SNPs related to T-tau/A $\beta$ 42 ratio, only 3 and 4 SNPs exhibited genome-wide significance to the T-tau and A $\beta$ 42 level, respectively (Table s2). According to Table s2, the loci from the *APOC1*, *APOE* and *TOMM40* region on Chromosome 19 are significantly associated with T-tau, A $\beta$ 42 and T-tau/A $\beta$ 42, and thus can potentially be driven by both the amyloid- $\beta$  pathway and the tau pathway.

In the two-marker interaction effect analysis, while 307 pairs of SNPs showed statistically significant interaction effects on the T-tau/A $\beta$ 42 ratio (first threshold: Bonferroni-corrected p-value<0.05), 6 pairs of SNPs passed the first threshold on the T-tau level and none passed the first threshold on the A $\beta$ 42 level (Table s1b). Subsequently, only 7 pairs among 307 significant interaction pairs passed the second threshold (cell-size criterion: all the cell sizes in the 3-by-3 contingency table are required to be either more than 5 or equal to 0). Table s3 shows that none of the interactions identified for the T-tau/A $\beta$ 42 ratio are significantly associated with T-tau and A $\beta$ 42 alone.

In sum, all the GWAS and GWIS results indicated that, when CSF A $\beta$ 42 alone and T-tau alone show less power for detecting the risk variants, the T-tau/A $\beta$ 42 ratio has the potential to serve as a more powerful quantitative trait to identify significant variants (Tables s1-s3).

**Table s1a. Numbers of GWAS results on different CSF phenotypes.**

| Phenotype<br>Test method  | CSF A $\beta$ 42                   |                                               | CSF T-tau                          |                                               | CSF T-tau/A $\beta$ 42 ratio       |                                               |
|---------------------------|------------------------------------|-----------------------------------------------|------------------------------------|-----------------------------------------------|------------------------------------|-----------------------------------------------|
|                           | Uncorrected<br>p-value $\leq$ 0.01 | Corrected <sup>a</sup><br>p-value $\leq$ 0.05 | Uncorrected<br>p-value $\leq$ 0.01 | Corrected <sup>a</sup><br>p-value $\leq$ 0.05 | Uncorrected<br>p-value $\leq$ 0.01 | Corrected <sup>a</sup><br>p-value $\leq$ 0.05 |
| GWAS<br>(Genotypic model) | 5756                               | 6                                             | 6166                               | 3                                             | 6591                               | 24                                            |

<sup>a</sup> Bonferroni corrected p-value $\leq$ 0.05.

**Table s1b. Numbers of GWIS results on different CSF phenotypes.**

| Phenotype<br>Test method    | CSF A $\beta$ 42                              |                                     | CSF T-tau                                     |                                     | CSF T-tau/A $\beta$ 42 ratio                  |                                     |
|-----------------------------|-----------------------------------------------|-------------------------------------|-----------------------------------------------|-------------------------------------|-----------------------------------------------|-------------------------------------|
|                             | Corrected <sup>a</sup><br>p-value $\leq$ 0.05 | Cell-size<br>criterion <sup>b</sup> | Corrected <sup>a</sup><br>p-value $\leq$ 0.05 | Cell-size<br>criterion <sup>b</sup> | Corrected <sup>a</sup><br>p-value $\leq$ 0.05 | Cell-size<br>criterion <sup>b</sup> |
| GWIS<br>(Linear regression) | 0                                             | 0                                   | 6                                             | 0                                   | <b>307</b>                                    | <b>7</b>                            |

<sup>a</sup> Bonferroni corrected p-value $\leq$ 0.05.

<sup>b</sup> Cell-size criterion: all the cell size in 3-by-3 contingency table are required to be either more than 5 or equal to 0

**Table s2. GWAS loci significantly associated with T-tau/Aβ<sub>42</sub> and their associations with the T-tau and Aβ<sub>42</sub> levels.**

| NO. | CHR | rs_No.    | Gene    | Single-marker p_value |         |                  | Corrected p_value       |                 |                  | R Square(T-tau/Aβ <sub>42</sub> ) |                    |
|-----|-----|-----------|---------|-----------------------|---------|------------------|-------------------------|-----------------|------------------|-----------------------------------|--------------------|
|     |     |           |         | T-tau/                | T-tau   | Aβ <sub>42</sub> | T-tau/ Aβ <sub>42</sub> | T-tau           | Aβ <sub>42</sub> | Model <sub>a</sub>                | Model <sub>b</sub> |
| 1   | 19  | rs4420638 | APOC1   | 3.50E-2               | 1.96E-1 | 6.45E-42         | <b>1.97E-21</b>         | <b>1.10E-07</b> | <b>3.64E-36</b>  | 1.00E-01                          | 1.00E-03           |
| 2   | 19  | rs769449  | APOE    | 6.41E-2               | 8.03E-1 | 2.26E-30         | <b>3.62E-16</b>         | <b>4.53E-05</b> | <b>1.27E-24</b>  | 9.10E-02                          | 0                  |
| 3   | 19  | rs2075650 | TOMM40  | 4.40E-1               | 2.92E-0 | 2.73E-22         | <b>2.48E-11</b>         | <b>1.63E-02</b> | <b>1.54E-16</b>  | 7.10E-02                          | 0                  |
| 4   | 19  | rs157582  | TOMM40  | 2.29E-1               | 3.56E-0 | 9.53E-24         | <b>1.25E-10</b>         | 1.82E-01        | <b>5.37E-18</b>  | 6.80E-02                          | 1.00E-03           |
| 5   | 1   | rs1337619 | B3GALT2 | 3.04E-1               | 3.92E-0 | 1.47E-01         | <b>1.70E-04</b>         | 1.98E-01        | 1                | 4.20E-02                          | 3.10E-02           |
| 6   | 12  | rs3020811 | LRP6    | 1.24E-0               | 4.49E-0 | 3.30E-02         | <b>6.90E-03</b>         | 1               | 1                | 3.00E-02                          | 2.60E-02           |
| 7   | 9   | rs2280302 | FBP1    | 1.28E-0               | 4.17E-0 | 1.82E-01         | <b>7.10E-03</b>         | 1               | 1                | 3.50E-02                          | 2.60E-02           |
| 8   | 9   | rs2280301 | FBP1    | 1.37E-0               | 4.51E-0 | 1.86E-01         | <b>7.60E-03</b>         | 1               | 1                | 3.50E-02                          | 2.60E-02           |
| 9   | 10  | rs1226579 | ITGA8   | 1.85E-0               | 8.36E-0 | 1.98E-01         | <b>1.03E-02</b>         | 1               | 1                | 3.40E-02                          | 2.40E-02           |
| 10  | 10  | rs7896076 | ITGA8   | 1.87E-0               | 8.73E-0 | 1.94E-01         | <b>1.04E-02</b>         | 1               | 1                | 3.40E-02                          | 2.40E-02           |
| 11  | 10  | rs1125363 | ITGA8   | 1.91E-0               | 8.59E-0 | 1.99E-01         | <b>1.07E-02</b>         | 1               | 1                | 3.40E-02                          | 2.40E-02           |
| 12  | 1   | rs1539581 | ATP5F1  | 2.34E-0               | 1.37E-0 | 3.65E-01         | <b>1.30E-02</b>         | 1               | 1                | 3.40E-02                          | 2.40E-02           |
| 13  | 1   | rs1012785 | LPAR3   | 2.46E-0               | 1.03E-0 | 7.70E-02         | <b>1.37E-02</b>         | 1               | 1                | 3.40E-02                          | 2.30E-02           |
| 14  | 15  | rs9806191 | DAPK2   | 2.56E-0               | 9.98E-0 | 1.20E-02         | <b>1.43E-02</b>         | 1               | 1                | 3.40E-02                          | 2.30E-02           |
| 15  | 11  | rs7129826 | DBX1    | 2.99E-0               | 1.03E-0 | 1.61E-01         | <b>1.67E-02</b>         | 1               | 1                | 3.30E-02                          | 2.30E-02           |
| 16  | 21  | rs1191098 | S100B   | 3.17E-0               | 1.06E-0 | 2.07E-01         | <b>1.77E-02</b>         | 1               | 1                | 3.30E-02                          | 2.30E-02           |
| 17  | 21  | rs1981331 | S100B   | 3.19E-0               | 9.94E-0 | 1.75E-01         | <b>1.78E-02</b>         | 1               | 1                | 3.30E-02                          | 2.30E-02           |
| 18  | 3   | rs9872004 | AADACL1 | 3.26E-0               | 1.01E-0 | 1.81E-01         | <b>1.81E-02</b>         | 1               | 1                | 3.30E-02                          | 2.30E-02           |
| 19  | 1   | rs1702763 | ATP5F1  | 3.26E-0               | 1.02E-0 | 2.07E-01         | <b>1.82E-02</b>         | 1               | 1                | 3.30E-02                          | 2.30E-02           |
| 20  | 1   | rs6662771 | SGIP1   | 3.44E-0               | 1.04E-0 | 1.76E-01         | <b>1.92E-02</b>         | 1               | 1                | 3.30E-02                          | 2.30E-02           |
| 21  | 11  | rs1279720 | DLG2    | 3.71E-0               | 2.70E-0 | 1.38E-01         | <b>2.06E-02</b>         | 1               | 1                | 3.30E-02                          | 2.50E-02           |
| 22  | 18  | rs6506440 | ARHGAP2 | 7.51E-0               | 6.42E-0 | 1.19E-01         | <b>4.14E-02</b>         | 1               | 1                | 3.20E-02                          | 2.60E-02           |
| 23  | 2   | rs6541929 | CNTNAP5 | 7.64E-0               | 2.45E-0 | 2.50E-02         | <b>4.21E-02</b>         | 1.29E-01        | 1                | 3.20E-02                          | 2.70E-02           |
| 24  | 2   | rs1726732 | CNTNAP5 | 8.23E-0               | 2.15E-0 | 2.90E-02         | <b>4.53E-02</b>         | 1.14E-01        | 1                | 3.10E-02                          | 2.80E-02           |

The bonferroni corrected p-values (< 0.05) are shown in bold.

<sup>a</sup>Model: Percent of additional variance in T-tau/Aβ<sub>42</sub> level explained by the main effect of SNPs after accounting for age, gender, and diagnosis.

<sup>b</sup>Model: Percent of additional variance in T-tau/Aβ<sub>42</sub> level explained by the main effect of SNPs after accounting for age, gender, diagnosis, and the *APOE* genotype.

**Table s3. GWIS locus pairs significantly associated with T-tau/Aβ<sub>42</sub> and their associations with the T-tau and Aβ<sub>42</sub> levels.**

| SNP 1 |            |                        |                  |          | SNP 2 |           |                        |                  |          | SNP 1 by SNP 2 Interaction |                  |          |                              |                  |       |
|-------|------------|------------------------|------------------|----------|-------|-----------|------------------------|------------------|----------|----------------------------|------------------|----------|------------------------------|------------------|-------|
| Chr   | SNP        | Uncorrected p-value    |                  |          | Chr   | SNP       | Uncorrected p-value    |                  |          | Uncorrected p-value        |                  |          | Bonferroni corrected p-value |                  |       |
|       |            | T-tau/Aβ <sub>42</sub> | Aβ <sub>42</sub> | T-tau    |       |           | T-tau/Aβ <sub>42</sub> | Aβ <sub>42</sub> | T-tau    | T-tau/Aβ <sub>42</sub>     | Aβ <sub>42</sub> | T-tau    | T-tau/Aβ <sub>42</sub>       | Aβ <sub>42</sub> | T-tau |
| 7     | rs6467419  | 3.18E-03               | 9.00E-02         | 1.00E-02 | 7     | rs1514061 | 6.24E-02               | 8.00E-02         | 5.10E-01 | <b>8.35E-10</b>            | 5.50E-02         | 3.51E-05 | <b>1.81E-02</b>              | 1                | 1     |
| 16    | rs4453471  | 5.19E-03               | 8.60E-01         | 1.00E-02 | 7     | rs1514061 | 6.24E-02               | 8.00E-02         | 5.10E-01 | <b>1.97E-10</b>            | 3.16E-02         | 5.17E-05 | <b>4.30E-03</b>              | 1                | 1     |
| 12    | rs7303599  | 1.21E-03               | 9.50E-01         | 1.00E-02 | 14    | rs7146454 | 1.94E-03               | 7.00E-02         | 1.00E-02 | <b>5.76E-11</b>            | 5.70E-03         | 1.94E-08 | <b>1.30E-03</b>              | 1                | 1     |
| 12    | rs7303599  | 1.21E-03               | 9.50E-01         | 1.00E-02 | 9     | rs167396  | 1.20E-01               | 3.00E-02         | 4.80E-01 | <b>6.91E-10</b>            | 2.86E-02         | 4.09E-07 | <b>1.50E-02</b>              | 1                | 1     |
| 14    | rs12894119 | 6.83E-03               | 2.00E-02         | 1.10E-01 | 7     | rs1482548 | 8.11E-01               | 1.80E-01         | 7.50E-01 | <b>2.95E-10</b>            | 1.26E-05         | 2.57E-07 | <b>6.40E-03</b>              | 1                | 1     |
| 13    | rs9550406  | 1.30E-03               | 2.00E-02         | 2.00E-02 | 8     | rs6471951 | 1.78E-03               | 9.00E-02         | 4.00E-02 | <b>1.49E-09</b>            | 2.91E-03         | 9.79E-06 | <b>3.24E-02</b>              | 1                | 1     |
| 10    | rs4881147  | 6.65E-04               | 2.00E-01         | 1.80E-03 | 21    | rs211953  | 1.60E-02               | 9.60E-01         | 4.00E-02 | <b>3.03E-10</b>            | 4.85E-04         | 2.93E-08 | <b>6.60E-03</b>              | 1                | 1     |

### Literature review of significant loci identified in this work

Table s4a and Table s4b summarize the prior results on genes related to the significant loci reported in this work. While Table s4a focuses on our GWAS findings, Table s4b focuses on our GWIS findings

**Table s4a. Literature survey results: Previously known associations regarding our GWAS findings.**

| NO.  | Gene                                                                                                                                                                                                                     | Study                                | Example Paper                                                              | Phenotype                                      | Finding                                                                                                                                |
|------|--------------------------------------------------------------------------------------------------------------------------------------------------------------------------------------------------------------------------|--------------------------------------|----------------------------------------------------------------------------|------------------------------------------------|----------------------------------------------------------------------------------------------------------------------------------------|
| 1    | <i>APOC1</i>                                                                                                                                                                                                             | GWAS                                 | (Souza, Araujo, Costa, Oliveira, & Alzheimer's Disease Neuroimaging, 2016) | CSF Amyloid- $\beta_{42}$                      | rs439401 in the intergenic region of <i>LOC100129500</i> and <i>APOC1</i>                                                              |
| 2    | <i>APOE</i>                                                                                                                                                                                                              | CSF biomarker study                  | (Smach et al., 2008)<br>(Tosun et al., 2010)                               | CSF Amyloid- $\beta_{42}$<br>CSF T-tau         | $A\beta_{42}$ was decreased and t-tau increased in AD patients. <i>APOE</i> e4+ AD patients had lower $A\beta_{42}$ than e4- patients. |
| 3    | <i>TOMM40</i>                                                                                                                                                                                                            | GWAS                                 | (Souza et al., 2016)                                                       | CSF Amyloid- $\beta_{42}$                      | rs2075650 in <i>TOMM40</i> (replicated in our GWAS)                                                                                    |
| 4    | <i>LRP6</i>                                                                                                                                                                                                              | Cell culture and mouse model studies | (Zhang, Bahety, & Ee, 2015)                                                | Tau phosphorylation                            | LRP5/6-mediated Wnt signaling to reduce tau phosphorylation                                                                            |
|      |                                                                                                                                                                                                                          |                                      | (Liu et al., 2014)                                                         | Amyloid- $\beta_{42}$<br>Amyloid- $\beta_{40}$ | LRP6-mediated Wnt signaling to down-regulated amyloid- $\beta$                                                                         |
| 5    | <i>S100B</i>                                                                                                                                                                                                             |                                      | (Esposito et al., 2008)                                                    | Tau                                            | S100B induces tau protein hyperphosphorylation                                                                                         |
|      |                                                                                                                                                                                                                          |                                      | (Mori et al., 2010)                                                        | Amyloid- $\beta$ ( $A\beta$ )                  | Overexpression of S100B accelerates AD-like                                                                                            |
| 6    | <i>DLG2</i>                                                                                                                                                                                                              | Quantitative proteomics              | (Hondius et al., 2016)                                                     | Hippocampus tissue                             | DLG2 exhibits an early-up, late-down expression pattern in protein levels in the hippocampus during AD pathology                       |
| 7    | <i>CNTNAP5</i>                                                                                                                                                                                                           | GWAS                                 | (Schott et al., 2016)                                                      | Posterior cortical atrophy (PCA)               | rs76854344 near <i>CNTNAP5</i>                                                                                                         |
| 8-17 | Our literature review did not identify studies showing the associations to the AD relevant phenotypes for the following genes:<br><i>B3GALT2, FBP1, ITGA8, ATP5F1, LPAR3, DAPK2, DBX1, AADACLI, SGIP1, and ARHGAP28.</i> |                                      |                                                                            |                                                |                                                                                                                                        |

**Table s4b. Literature survey results: Previously known associations regarding our GWIS findings.**

| NO.  | Gene                                                                                                                                                                            | Study                 | Example Paper            | Phenotype                                             | Finding                                                                                                                           |
|------|---------------------------------------------------------------------------------------------------------------------------------------------------------------------------------|-----------------------|--------------------------|-------------------------------------------------------|-----------------------------------------------------------------------------------------------------------------------------------|
| 1    | <i>PLXNA4</i>                                                                                                                                                                   | GWAS                  | (Jun et al., 2014)       | Diagnosis, phospho-tau, total-tau                     | <i>PLXNA4</i> SNP rs277470 increased tau phosphorylation                                                                          |
| 2    | <i>CDH13</i>                                                                                                                                                                    | Set-based GWAS        | (Kohannim et al., 2012)  | Temporal lobe volume                                  | Discovered 22 genes including <i>CDH13</i> significantly associated with temporal lobe volume                                     |
| 3    | <i>ADIPOR2</i>                                                                                                                                                                  | Cell culture study    | (Chan et al., 2012)      | Amyloid- $\beta$ ( $A\beta$ )                         | Adiponectin was protective against $A\beta$ induced neuronal cytotoxicity under oxidative stress                                  |
| 4    | <i>ADSSLI</i>                                                                                                                                                                   | Candidate gene        | (Rosenthal et al., 2012) | LOAD diagnosis, Amyloid- $\beta$ ( $A\beta$ )         | Haplotype analysis reported significant association in <i>ADSSLI</i> (an $A\beta$ toxicity modifier genes)                        |
| 5    | <i>GSN</i>                                                                                                                                                                      | Plasma biomarkers     | (Peng, Jia, & Qin, 2015) | Relative GSN = GSN/ ( $A\beta_{42}$ + $A\beta_{40}$ ) | Relative GSN for AD diagnosis: AUC = 0.66, sensitivity = 54.9%, specificity = 75.2%.                                              |
|      |                                                                                                                                                                                 | Mouse model           | (Yang et al., 2014)      | GSN, $A\beta_{42}$ , $A\beta_{40}$                    | Gelsonlin (GSN) inhibits $A\beta$ fibrillation, solubilizes preformed $A\beta$ fibrils, and helps in its clearance from the brain |
| 6    | <i>PITRM1</i>                                                                                                                                                                   | Yeast & mouse studies | (Brunetti et al., 2016)  | Amyloid- $\beta$ ( $A\beta$ )                         | PITRM1 is associated with $A\beta$ degradation                                                                                    |
| 7-11 | Our literature review did not identify studies showing the associations to the AD relevant phenotypes for the following genes:<br><i>INHBA, NIN, MTUS2, RLBP1L1, and CXADR.</i> |                       |                          |                                                       |                                                                                                                                   |

## References

- Brunetti, D., Torsvik, J., Dallabona, C., Teixeira, P., Sztromwasser, P., Fernandez-Vizarra, E., . . . Bindoff, L. A. (2016). Defective PITRM1 mitochondrial peptidase is associated with Abeta amyloidotic neurodegeneration. *EMBO Mol Med*, *8*(3), 176-190. doi:10.15252/emmm.201505894
- Chan, K. H., Lam, K. S., Cheng, O. Y., Kwan, J. S., Ho, P. W., Cheng, K. K., . . . Xu, A. (2012). Adiponectin is protective against oxidative stress induced cytotoxicity in amyloid-beta neurotoxicity. *PLoS One*, *7*(12), e52354. doi:10.1371/journal.pone.0052354
- Espósito, G., Scuderi, C., Lu, J., Savani, C., De Filippis, D., Iuvone, T., . . . Steardo, L. (2008). S100B induces tau protein hyperphosphorylation via Dickkopf-1 up-regulation and disrupts the Wnt pathway in human neural stem cells. *J Cell Mol Med*, *12*(3), 914-927. doi:10.1111/j.1582-4934.2008.00159.x
- Hondius, D. C., van Nierop, P., Li, K. W., Hoozemans, J. J., van der Schors, R. C., van Haastert, E. S., . . . Smit, A. B. (2016). Profiling the human hippocampal proteome at all pathologic stages of Alzheimer's disease. *Alzheimers Dement*, *12*(6), 654-668. doi:10.1016/j.jalz.2015.11.002
- Jun, G., Asai, H., Zeldich, E., Drapeau, E., Chen, C., Chung, J., . . . Farrer, L. A. (2014). PLXNA4 is associated with Alzheimer disease and modulates tau phosphorylation. *Ann Neurol*, *76*(3), 379-392. doi:10.1002/ana.24219
- Kohannim, O., Hibar, D. P., Stein, J. L., Jahanshad, N., Hua, X., Rajagopalan, P., . . . Alzheimer's Disease Neuroimaging, I. (2012). Discovery and Replication of Gene Influences on Brain Structure Using LASSO Regression. *Front Neurosci*, *6*, 115. doi:10.3389/fnins.2012.00115
- Liu, C. C., Tsai, C. W., Deak, F., Rogers, J., Penuliar, M., Sung, Y. M., . . . Bu, G. (2014). Deficiency in LRP6-mediated Wnt signaling contributes to synaptic abnormalities and amyloid pathology in Alzheimer's disease. *Neuron*, *84*(1), 63-77. doi:10.1016/j.neuron.2014.08.048
- Mori, T., Koyama, N., Arendash, G. W., Horikoshi-Sakuraba, Y., Tan, J., & Town, T. (2010). Overexpression of human S100B exacerbates cerebral amyloidosis and gliosis in the Tg2576 mouse model of Alzheimer's disease. *Glia*, *58*(3), 300-314. doi:10.1002/glia.20924
- Peng, M., Jia, J., & Qin, W. (2015). Plasma gelsolin and matrix metalloproteinase 3 as potential biomarkers for Alzheimer disease. *Neurosci Lett*, *595*, 116-121. doi:10.1016/j.neulet.2015.04.014
- Rosenthal, S. L., Wang, X., Demirci, F. Y., Barmada, M. M., Ganguli, M., Lopez, O. L., & Kambh, M. I. (2012). Beta-amyloid toxicity modifier genes and the risk of Alzheimer's disease. *Am J Neurodegener Dis*, *1*(2), 191-198.
- Schott, J. M., Crutch, S. J., Carrasquillo, M. M., Uphill, J., Shakespeare, T. J., Ryan, N. S., . . . Mead, S. (2016). Genetic risk factors for the posterior cortical atrophy variant of Alzheimer's disease. *Alzheimers Dement*, *12*(8), 862-871. doi:10.1016/j.jalz.2016.01.010
- Smach, M. A., Charfeddine, B., Lammouchi, T., Harrabi, I., Ben Othman, L., Dridi, H., . . . Limem, K. (2008). CSF beta-amyloid 1-42 and tau in Tunisian patients with Alzheimer's disease: the effect of APOE epsilon4 allele. *Neurosci Lett*, *440*(2), 145-149. doi:10.1016/j.neulet.2008.05.076
- Souza, M. B., Araujo, G. S., Costa, I. G., Oliveira, J. R., & Alzheimer's Disease Neuroimaging, I. (2016). Combined Genome-Wide CSF Abeta-42's Associations and Simple Network Properties Highlight New Risk Factors for Alzheimer's Disease. *J Mol Neurosci*, *58*(1), 120-128. doi:10.1007/s12031-015-0667-6
- Tosun, D., Schuff, N., Truran-Sacrey, D., Shaw, L. M., Trojanowski, J. Q., Aisen, P., . . . Alzheimer's Disease Neuroimaging, I. (2010). Relations between brain tissue loss, CSF biomarkers, and the ApoE genetic profile: a longitudinal MRI study. *Neurobiol Aging*, *31*(8), 1340-1354. doi:10.1016/j.neurobiolaging.2010.04.030
- Yang, W., Chauhan, A., Mehta, S., Mehta, P., Gu, F., & Chauhan, V. (2014). Trichostatin A increases the levels of plasma gelsolin and amyloid beta-protein in a transgenic mouse model of Alzheimer's disease. *Life Sci*, *99*(1-2), 31-36. doi:10.1016/j.lfs.2014.01.064
- Zhang, L., Bahety, P., & Ee, P. L. (2015). Wnt co-receptor LRP5/6 overexpression confers protection against hydrogen peroxide-induced neurotoxicity and reduces tau phosphorylation in SH-SY5Y cells. *Neurochem Int*, *87*, 13-21. doi:10.1016/j.neuint.2015.05.001
